# Supplementary material
Source: PubMed Central journal article supplement (PMC3399118)
Supplement: NIHMS386217-supplement-1_si_001.pdf [file NIHMS386217-supplement-1_si_001.pdf]

# Supporting Information

## Fundamental Reaction Pathway and Free Energy Profile for Inhibition of Proteasome by Epoxomicin

Donghui Wei,<sup>1,4</sup> Beilei Lei,<sup>2,3,4</sup> Mingsheng Tang,<sup>1</sup> and Chang-Guo Zhan<sup>4</sup>

<sup>1</sup>*Department of Chemistry, Zhengzhou University, Daxue Road, Zhengzhou, Henan 450052, China,*

<sup>2</sup>*College of Life Sciences and* <sup>3</sup>*Center of Bioinformatics, Northwest A&F University, Yangling, Shanxi 712100, China, and* <sup>4</sup>*Department of Pharmaceutical Sciences, College of Pharmacy, University of*

*Kentucky, 789 South Limestone Street, Lexington, KY 40536.*

*E-mail: zhan@uky.edu*

**Supporting Information Available.** Molecular structures of selected inhibitors bound to Thr1 residue in the active sites of proteasome; the free energy profiles determined by the QM/MM-FE calculations for the pathways *via* transition state TS6<sup>a</sup> or TS6<sup>b</sup>; the free energy barriers and absolute QM/MM energies calculated at the QM/MM (Method/6-31++G\*\*:*AMBER*; Method = B3LYP, MP2, M052X, B3PW91, or B3P86) level; coordinates of QM part of the geometries optimized at the QM/MM(B3LYP/6-31G\*:*AMBER*) level. This information is available free of charge *via* the Internet at <http://pubs.acs.org/>.



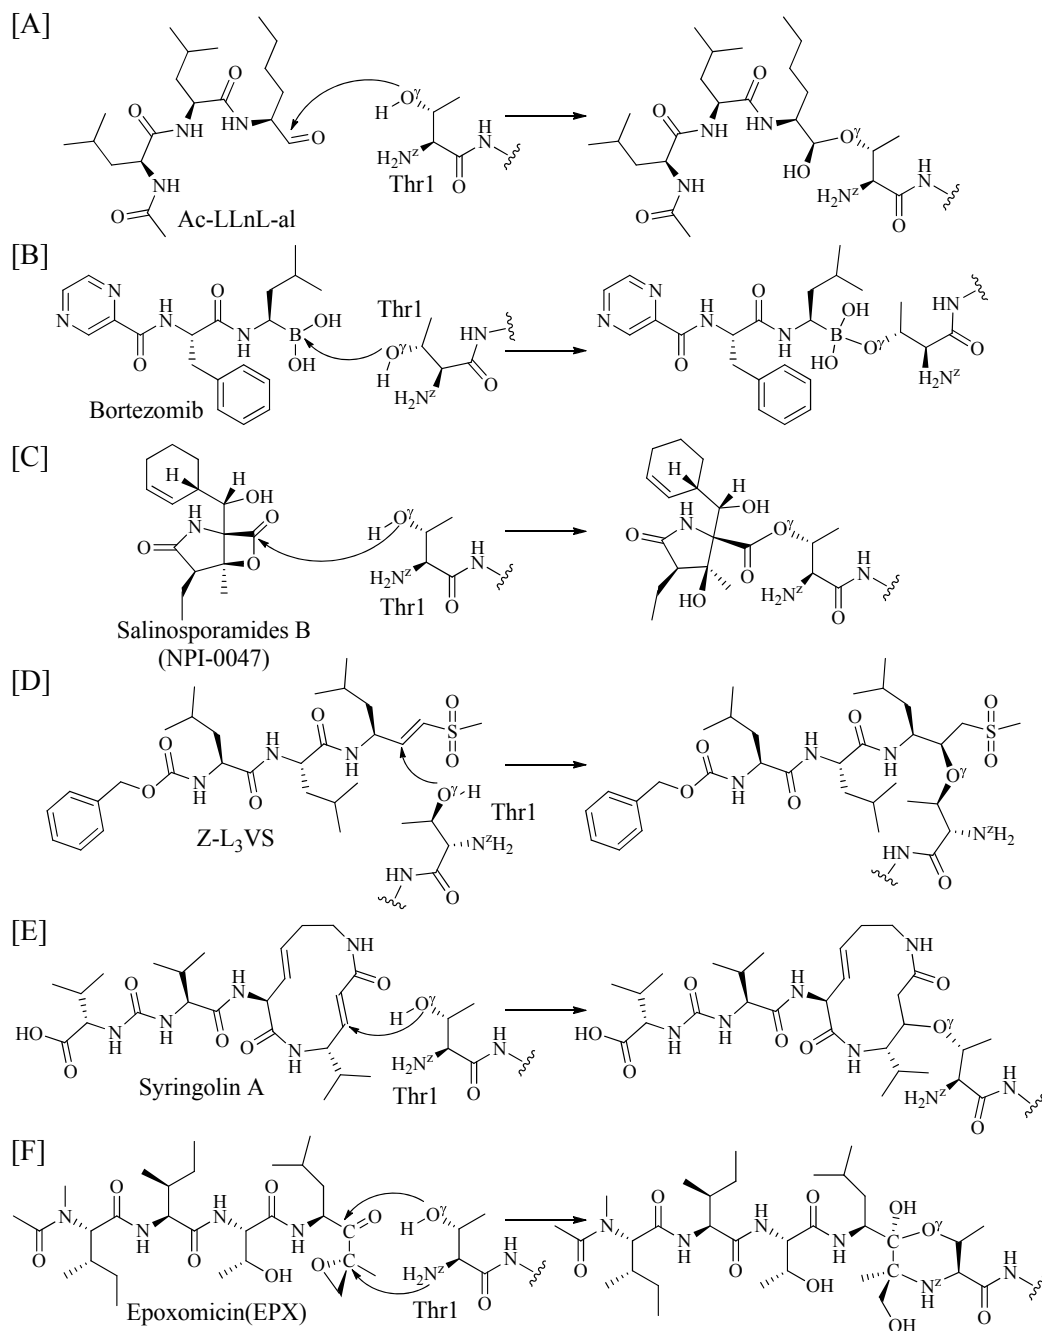

Scheme S1. Molecular structures of selected inhibitors bound to Thr1 residue in the active sites of proteasome.



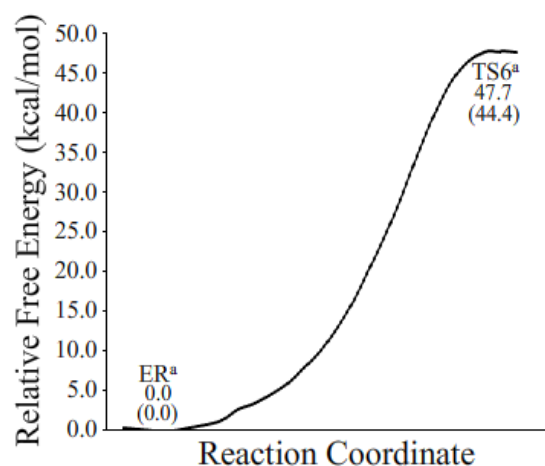

Figure S1. Free energy profile determined by the QM/MM-FE calculations for the possible pathway *via* transition state TS6<sup>a</sup>. There were 25 points along the reaction coordinate used in the FEP calculations. The relative free energies were determined first without the zero-point and thermal corrections, and then corrected with the zero-point and thermal corrections for the QM subsystem (values in parentheses). The QM/MM-FE calculations were performed at the B3LYP/6-31++G\*\*:*AMBER* level for each QM/MM optimized geometry along the reaction path.

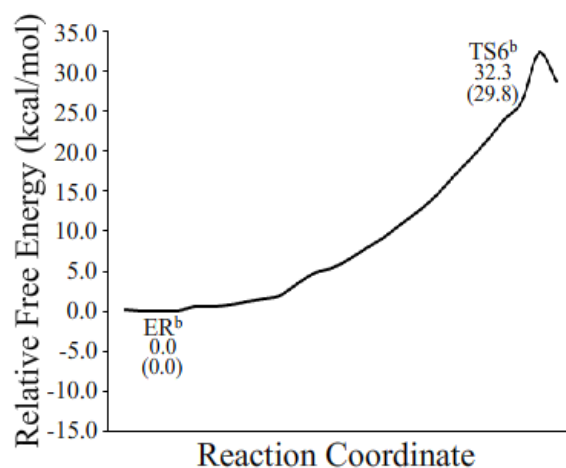

Figure S2. Free energy profile determined by the QM/MM-FE calculations for the pathway *via* transition state TS6<sup>b</sup>. There were 26 points along the reaction coordinate used in the FEP calculations. The relative free energies were determined first without the zero-point and thermal corrections, and then corrected with the zero-point and thermal corrections for the QM subsystem (values in parentheses). The QM/MM-FE calculations were performed at the B3LYP/6-31++G\*\*:*AMBER* level for each QM/MM optimized geometry along the reaction path.



Table S1. The free energy barriers (in kcal/mol) calculated by the QM/MM-FE calculations (corrected with the zero-point and thermal corrections for the QM subsystem) using different QM methods. **Note:** The actual free energy barrier associated with transition state  $\Delta G_{TS1}^b$  should be the  $\Delta G_{TS1}^b$  value listed in this table plus 1.7 kcal/mol (for the free energy of ER<sup>b</sup> relative to ER<sup>a</sup>), as discussed in the text of the paper.

| Method/Basis set    | $\Delta G_{TS1}^a$ | $\Delta G_{TS2}^a$ | $\Delta G_{TS3}^a$ | $\Delta G_{TS4}^a$ | $\Delta G_{TS5}^a$ | $\Delta G_{TS6}^a$ | $\Delta G_{TS1}^b$ | $\Delta G_{TS3}^b$ | $\Delta G_{TS6}^b$ |
|---------------------|--------------------|--------------------|--------------------|--------------------|--------------------|--------------------|--------------------|--------------------|--------------------|
| MP2/6-31+G(d)       |                    |                    |                    | 26.8               |                    |                    |                    |                    |                    |
| MP2/6-31+G(d,p)     |                    |                    |                    | 26.9               |                    |                    |                    |                    |                    |
| MP2/6-31++G(d)      |                    |                    |                    | 27.2               |                    |                    |                    |                    |                    |
| MP2/6-31++G(d,p)    | 9.4                | 9.2                | -1.7               | 27.3               | 1.5                | 50.5               | 8.9                | -0.8               | 29.8               |
| B3LYP/6-31+G(d)     |                    |                    |                    | 23.3               |                    |                    |                    |                    |                    |
| B3LYP /6-31+G(d,p)  |                    |                    |                    | 23.5               |                    |                    |                    |                    |                    |
| B3LYP /6-31++G(d)   |                    |                    |                    | 23.6               |                    |                    |                    |                    |                    |
| B3LYP /6-31++G(d,p) | 9.9                | 9.0                | -1.7               | 23.6               | 1.2                | 44.4               | 9.3                | -1.6               | 29.8               |
| M05-2X/6-31++G(d,p) | 10.5               | 9.5                | -1.2               | 26.1               | 1.4                | 47.6               | 10.1               | -0.6               | 28.6               |
| B3PW91/6-31++G(d,p) | 8.7                | 9.3                | -1.3               | 26.0               | 1.0                | 44.0               | 8.7                | -0.8               | 28.0               |
| B3P86/6-31++G(d, p) | 8.3                | 8.6                | -1.3               | 25.5               | 1.1                | 42.9               | 8.6                | -0.7               | 28.1               |



Table S2. Absolute QM/MM energies (in Hartree) calculated at the QM/MM (Method/6-31++G\*\*:  
AMBER; Method=B3LYP, MP2, M052X, B3PW91, or B3P86) level (single-point energy calculations) using the geometries optimized at the QM/MM(B3LYP/6-31G\*:  
AMBER) level. **Note:** ER<sup>a</sup>(1) and ER<sup>a</sup>(2) are different conformations of ER<sup>a</sup> suitable for different reaction pathways. ER<sup>a</sup>(1) is connected to transition state TS1<sup>a</sup>, whereas ER<sup>a</sup>(2) is connected to transition state TS6<sup>a</sup>. Similarly, ER<sup>b</sup>(1) and ER<sup>b</sup>(2) are different conformations of ER<sup>b</sup>. ER<sup>b</sup>(1) is connected to transition state TS1<sup>b</sup>, whereas ER<sup>b</sup>(2) is connected to transition state TS6<sup>b</sup>.

| State               | B3LYP        | MP2          | M052X        | B3PW91       | B3P86        |
|---------------------|--------------|--------------|--------------|--------------|--------------|
| ER <sup>a</sup> (1) | -1431.288007 | -1426.805455 | -1430.974039 | -1430.844475 | -1435.298045 |
| ER <sup>a</sup> (2) | -1431.277507 | -1426.796430 | -1430.964780 | -1430.834641 | -1435.288516 |
| TS1 <sup>a</sup>    | -1431.271294 | -1426.789587 | -1430.956359 | -1430.829587 | -1435.283813 |
| TS2 <sup>a</sup>    | -1431.243770 | -1426.762370 | -1430.926604 | -1430.800912 | -1435.256593 |
| TS3 <sup>a</sup>    | -1431.266001 | -1426.791381 | -1430.959045 | -1430.826659 | -1435.283542 |
| TS4 <sup>a</sup>    | -1431.237937 | -1426.759214 | -1430.932719 | -1430.795300 | -1435.252816 |
| TS5 <sup>a</sup>    | -1431.276810 | -1426.807158 | -1430.977676 | -1430.838649 | -1435.297151 |
| TS6 <sup>a</sup>    | -1431.198802 | -1426.708016 | -1430.881031 | -1430.756498 | -1435.212177 |
| INT1 <sup>a</sup>   | -1431.259450 | -1426.778332 | -1430.943025 | -1430.816971 | -1435.271575 |
| INT2 <sup>a</sup>   | -1431.267251 | -1426.792624 | -1430.961184 | -1430.828553 | -1435.285392 |
| INT3 <sup>a</sup>   | -1431.277494 | -1426.804611 | -1430.976168 | -1430.838596 | -1435.295374 |
| INT4 <sup>a</sup>   | -1431.278359 | -1426.809298 | -1430.979509 | -1430.839875 | -1435.298507 |
| EP <sup>a</sup>     | -1431.316043 | -1426.846375 | -1431.017758 | -1430.877680 | -1435.335791 |
| ER <sup>b</sup> (1) | -1431.260175 | -1426.778051 | -1430.947843 | -1430.816556 | -1435.273219 |
| ER <sup>b</sup> (2) | -1431.263330 | -1426.779976 | -1430.953433 | -1430.819869 | -1435.278207 |
| TS1 <sup>b</sup>    | -1431.245195 | -1426.763699 | -1430.931633 | -1430.802535 | -1435.259353 |
| TS3 <sup>b</sup>    | -1431.244902 | -1426.771468 | -1430.943526 | -1430.806190 | -1435.265191 |
| TS6 <sup>b</sup>    | -1431.212454 | -1426.729121 | -1430.904496 | -1430.771956 | -1435.230039 |
| INT2 <sup>b</sup>   | -1431.245637 | -1426.773502 | -1430.945909 | -1430.808339 | -1435.267485 |
| INT3 <sup>b</sup>   | -1431.257947 | -1426.785184 | -1430.958289 | -1430.818357 | -1435.277200 |



**Atomic coordinates of the QM part of the geometries optimized at the QM/MM(B3LYP/6-31G\*:AMBER) level.**

**Note:** Atom “F” represents the one-free-valence boundary atom described by the pseudo-potential in the QM subsystem.

ER<sup>a</sup>(1)

|   |             |             |             |
|---|-------------|-------------|-------------|
| N | 48.83505800 | 43.73246500 | 54.15952900 |
| H | 49.46406800 | 44.43722200 | 53.77352400 |
| H | 49.19636500 | 43.52036500 | 55.09533500 |
| C | 47.47114000 | 44.24953300 | 54.23769200 |
| H | 47.30394300 | 44.84933300 | 53.34327900 |
| C | 46.54710600 | 43.01118700 | 54.12643900 |
| H | 46.71844900 | 42.37421600 | 55.01048200 |
| C | 45.06870000 | 43.30598300 | 53.97225500 |
| H | 44.90809000 | 44.13348800 | 53.27309400 |
| H | 44.55343500 | 42.42879700 | 53.57310500 |
| H | 44.61654200 | 43.56428100 | 54.93285800 |
| O | 47.00607000 | 42.28915200 | 52.96525100 |
| H | 47.98736200 | 42.44894500 | 53.02241900 |
| C | 47.14494200 | 45.09132200 | 55.48062300 |
| O | 47.60548600 | 44.80050000 | 56.59501600 |
| N | 46.25845500 | 46.05602300 | 55.21272500 |
| H | 46.13783800 | 46.30180000 | 54.22458600 |
| F | 45.62274800 | 47.05815400 | 56.16369800 |
| F | 44.59729500 | 44.11263300 | 50.08190900 |
| C | 46.01178500 | 43.95445500 | 49.56259600 |
| H | 46.15200500 | 43.01825000 | 49.01600900 |
| H | 46.30175800 | 44.78418500 | 48.90832900 |
| N | 47.09121000 | 43.92316400 | 50.61809400 |
| H | 47.30127700 | 44.87127800 | 50.98860100 |
| H | 46.88900600 | 43.28666500 | 51.42219800 |
| H | 47.96225300 | 43.57289600 | 50.17794600 |
| F | 49.87428300 | 36.03954800 | 51.12412200 |
| C | 49.64651400 | 37.47564400 | 50.84088500 |
| O | 50.40617800 | 38.16892900 | 50.17807400 |
| N | 48.45788300 | 37.96260600 | 51.26951000 |
| H | 47.85045300 | 37.42303200 | 51.87614200 |
| C | 48.04980500 | 39.25836900 | 50.80153400 |
| C | 46.51687400 | 39.36524500 | 50.92229500 |
| C | 45.78141000 | 40.31571600 | 49.95465800 |
| C | 44.31446900 | 39.87074000 | 49.85203600 |
| H | 43.87675200 | 39.69017500 | 50.83854300 |
| H | 44.23983100 | 38.94113100 | 49.27148100 |
| H | 43.70341800 | 40.62899000 | 49.35334500 |



|   |             |             |             |
|---|-------------|-------------|-------------|
| C | 46.41589000 | 40.39006400 | 48.55867700 |
| H | 45.78313600 | 40.96993400 | 47.87702500 |
| H | 46.54099400 | 39.39354900 | 48.11325500 |
| H | 47.39529100 | 40.87532600 | 48.59936400 |
| H | 45.80343500 | 41.31771100 | 50.39332800 |
| H | 46.15318600 | 38.34711100 | 50.72950800 |
| H | 46.23594300 | 39.60947400 | 51.95342700 |
| H | 48.31274400 | 39.29356200 | 49.73834300 |
| C | 48.88498300 | 40.41315500 | 51.37727000 |
| O | 48.80182800 | 41.51789700 | 50.86593500 |
| C | 49.93890900 | 40.22546100 | 52.47121300 |
| C | 51.35041500 | 40.47593400 | 51.98891700 |
| H | 52.04979700 | 40.24964200 | 52.79810900 |
| H | 51.45617500 | 41.52198100 | 51.68904900 |
| H | 51.57021800 | 39.82186900 | 51.14744600 |
| C | 49.57632100 | 40.50330500 | 53.87142300 |
| H | 50.34445200 | 40.89908600 | 54.53485700 |
| H | 48.55105600 | 40.73997900 | 54.13669900 |
| O | 49.77004300 | 39.14339000 | 53.41878700 |
| O | 50.61595700 | 38.11362600 | 55.83519100 |
| H | 49.99215900 | 38.78862500 | 56.14407300 |
| H | 50.70721300 | 38.32798000 | 54.88428400 |

ER<sup>a</sup>(2)

|   |             |             |             |
|---|-------------|-------------|-------------|
| N | 48.90780900 | 43.63184600 | 54.05208200 |
| H | 49.54978800 | 44.33469500 | 53.68705100 |
| H | 49.22616000 | 43.44845600 | 55.00965700 |
| C | 47.55271600 | 44.17927200 | 54.07012200 |
| H | 47.44247300 | 44.78274700 | 53.16987200 |
| C | 46.57509600 | 42.98813300 | 53.92847400 |
| H | 46.71382400 | 42.32516400 | 54.79974800 |
| C | 45.10604200 | 43.33468200 | 53.77275400 |
| H | 44.97052100 | 44.16725000 | 53.07429600 |
| H | 44.56690000 | 42.47267000 | 53.36988400 |
| H | 44.65576100 | 43.60429200 | 54.73053600 |
| O | 46.99325900 | 42.27844000 | 52.74952600 |
| H | 47.97565700 | 42.38847100 | 52.77183200 |
| C | 47.21296800 | 45.02057800 | 55.30045600 |
| O | 47.65736300 | 44.73455200 | 56.42364900 |
| N | 46.32985300 | 45.97859800 | 55.01555100 |
| H | 46.19260600 | 46.20165000 | 54.02448500 |
| F | 45.67320500 | 46.94248900 | 55.98034800 |
| F | 44.46224700 | 44.04275300 | 49.93461800 |
| C | 45.86533500 | 43.94123500 | 49.37286300 |



|                  |             |             |             |
|------------------|-------------|-------------|-------------|
| H                | 46.02362200 | 43.01963600 | 48.80291500 |
| H                | 46.11244100 | 44.79037000 | 48.72702000 |
| N                | 46.96757000 | 43.92630400 | 50.40686900 |
| H                | 47.17530200 | 44.87682500 | 50.77186200 |
| H                | 46.79482900 | 43.28466300 | 51.21247300 |
| H                | 47.84052300 | 43.59444300 | 49.95346900 |
| F                | 49.80071700 | 36.13053600 | 51.06909800 |
| C                | 49.60354500 | 37.57466800 | 50.82561100 |
| O                | 50.38672500 | 38.27863300 | 50.20205600 |
| N                | 48.41096300 | 38.05749900 | 51.24163000 |
| H                | 47.79681900 | 37.51615600 | 51.83937400 |
| C                | 48.03259500 | 39.36283300 | 50.78421000 |
| C                | 46.49519400 | 39.49156300 | 50.83578700 |
| C                | 45.81323000 | 40.26301200 | 49.68061600 |
| C                | 44.37116600 | 39.75632000 | 49.53064500 |
| H                | 43.84325900 | 39.74671600 | 50.48959200 |
| H                | 44.37180700 | 38.73495900 | 49.12878700 |
| H                | 43.80045500 | 40.38209800 | 48.83687700 |
| C                | 46.55620100 | 40.17072700 | 48.33962600 |
| H                | 45.95774000 | 40.60990600 | 47.53373700 |
| H                | 46.76902700 | 39.13104300 | 48.05577100 |
| H                | 47.50472700 | 40.71362400 | 48.38089200 |
| H                | 45.77012200 | 41.31819100 | 49.96442000 |
| H                | 46.12629700 | 38.45839000 | 50.80054700 |
| H                | 46.17514000 | 39.91601700 | 51.79258200 |
| H                | 48.34780100 | 39.40905200 | 49.73807600 |
| C                | 48.87771100 | 40.48101900 | 51.40550500 |
| O                | 48.88938900 | 41.58142400 | 50.87698800 |
| C                | 49.83811100 | 40.25609700 | 52.57811100 |
| C                | 51.28297900 | 40.47908600 | 52.20260100 |
| H                | 51.91228500 | 40.29276000 | 53.07686700 |
| H                | 51.41838200 | 41.50588000 | 51.85329500 |
| H                | 51.56034400 | 39.78883300 | 51.40909700 |
| C                | 49.38422100 | 40.52115900 | 53.95363300 |
| H                | 50.11067600 | 40.90558900 | 54.66901700 |
| H                | 48.34649100 | 40.76290000 | 54.15655200 |
| O                | 49.59161200 | 39.16334300 | 53.50305800 |
| O                | 50.54707600 | 38.13366800 | 55.92679900 |
| H                | 49.97318100 | 38.79884100 | 56.33762000 |
| H                | 50.56664600 | 38.40721100 | 54.98620700 |
| TS1 <sup>a</sup> |             |             |             |
| N                | 48.79033800 | 43.75577600 | 54.08654800 |
| H                | 49.43859000 | 44.42592300 | 53.66234600 |



|   |             |             |             |
|---|-------------|-------------|-------------|
| H | 49.19190600 | 43.46919800 | 54.99133200 |
| C | 47.40900500 | 44.27514800 | 54.22413000 |
| H | 47.23313100 | 44.87359800 | 53.33526300 |
| C | 46.57109800 | 42.96207700 | 54.05360000 |
| H | 46.69962700 | 42.36774400 | 54.98408800 |
| C | 45.08695500 | 43.21712500 | 53.84189000 |
| H | 44.92098200 | 44.00446500 | 53.09851800 |
| H | 44.61159700 | 42.30957700 | 53.46418400 |
| H | 44.58956100 | 43.50365200 | 54.77389700 |
| O | 47.20194900 | 42.31759000 | 52.97774300 |
| H | 48.40540900 | 42.86644800 | 53.36359000 |
| C | 47.13649500 | 45.09025400 | 55.47304000 |
| O | 47.62408900 | 44.79169100 | 56.57402000 |
| N | 46.24842400 | 46.05342800 | 55.21250500 |
| H | 46.10673700 | 46.29133500 | 54.22540700 |
| F | 45.61978400 | 47.04947300 | 56.16242700 |
| F | 44.59843500 | 44.11233900 | 50.07921600 |
| C | 46.02245300 | 43.92563100 | 49.59475800 |
| H | 46.15301100 | 42.98829000 | 49.05072300 |
| H | 46.33734700 | 44.74987600 | 48.94460600 |
| N | 47.09435200 | 43.87898900 | 50.66276400 |
| H | 47.29688700 | 44.83038100 | 51.02524200 |
| H | 46.94709500 | 43.22311700 | 51.49301600 |
| H | 47.96315200 | 43.54706100 | 50.20493400 |
| F | 49.86195800 | 36.05689200 | 51.11382500 |
| C | 49.64037800 | 37.49492700 | 50.82604200 |
| O | 50.41515800 | 38.19092200 | 50.18341100 |
| N | 48.43933300 | 37.97624700 | 51.22321800 |
| H | 47.83814500 | 37.44511800 | 51.84309900 |
| C | 48.04379600 | 39.28588900 | 50.77762500 |
| C | 46.51815500 | 39.41178500 | 50.95640800 |
| C | 45.74803700 | 40.34296500 | 49.99509000 |
| C | 44.29422700 | 39.85334000 | 49.90224500 |
| H | 43.87591900 | 39.63635600 | 50.88995900 |
| H | 44.24286300 | 38.93310100 | 49.30401700 |
| H | 43.65176200 | 40.60118100 | 49.42792900 |
| C | 46.36188300 | 40.44405100 | 48.59114700 |
| H | 45.70516400 | 41.01672100 | 47.92596000 |
| H | 46.49938000 | 39.45465000 | 48.13372900 |
| H | 47.33257600 | 40.94795400 | 48.61974400 |
| H | 45.74368100 | 41.34203700 | 50.44023600 |
| H | 46.13865900 | 38.39264100 | 50.80341000 |
| H | 46.28365900 | 39.68934000 | 51.99027900 |
| H | 48.27088900 | 39.32609000 | 49.70688300 |



|   |             |             |             |
|---|-------------|-------------|-------------|
| C | 48.92868900 | 40.41752500 | 51.33386200 |
| O | 48.93847400 | 41.49839000 | 50.77249100 |
| C | 49.93428200 | 40.21188300 | 52.46924400 |
| C | 51.36344500 | 40.46660200 | 52.05010800 |
| H | 52.03270300 | 40.24501400 | 52.88582500 |
| H | 51.47620900 | 41.51163300 | 51.74862600 |
| H | 51.61705200 | 39.81658200 | 51.21533900 |
| C | 49.50467600 | 40.46214100 | 53.85575500 |
| H | 50.24484700 | 40.83856600 | 54.56387400 |
| H | 48.46596400 | 40.71452300 | 54.04663900 |
| O | 49.72565000 | 39.11268000 | 53.39314000 |
| O | 50.61286600 | 38.12167500 | 55.81543900 |
| H | 49.97908300 | 38.78964300 | 56.11873000 |
| H | 50.68917600 | 38.32299100 | 54.85971800 |

TS2<sup>a</sup>

|   |             |             |             |
|---|-------------|-------------|-------------|
| N | 48.92441400 | 43.78009800 | 53.65806300 |
| H | 49.34828900 | 44.71237900 | 53.53044500 |
| H | 49.36642500 | 43.39269500 | 54.50605500 |
| C | 47.43908200 | 43.89888000 | 53.86417200 |
| H | 47.03439800 | 44.30211500 | 52.93982700 |
| C | 46.81868100 | 42.47744400 | 54.11363000 |
| H | 47.29936200 | 42.15200000 | 55.06761100 |
| C | 45.31899900 | 42.61161100 | 54.41896700 |
| H | 44.76561100 | 42.86910300 | 53.50896900 |
| H | 44.99827500 | 41.62227200 | 54.74176300 |
| H | 45.06819500 | 43.32450100 | 55.20948600 |
| O | 46.98575800 | 41.59752100 | 53.07894500 |
| H | 49.12989600 | 43.18900800 | 52.81306800 |
| C | 47.20689000 | 44.83342500 | 55.04591700 |
| O | 47.74390000 | 44.59712000 | 56.14067500 |
| N | 46.33614000 | 45.80812500 | 54.79014100 |
| H | 46.12651500 | 46.00297800 | 53.80542900 |
| F | 45.74653800 | 46.77234600 | 55.79370100 |
| F | 44.46904800 | 44.02418500 | 49.87348300 |
| C | 45.86235600 | 44.01975900 | 49.28891700 |
| H | 46.03548900 | 43.18500400 | 48.60205200 |
| H | 46.08944300 | 44.95232800 | 48.76264600 |
| N | 46.95682300 | 43.89338100 | 50.32429200 |
| H | 47.14792800 | 44.80741800 | 50.77587100 |
| H | 46.76783000 | 43.17554700 | 51.04346700 |
| H | 47.84780900 | 43.59388200 | 49.88140700 |
| F | 49.50730500 | 36.48429300 | 50.97298800 |
| C | 49.36580600 | 37.94119300 | 50.69199400 |



|   |             |             |             |
|---|-------------|-------------|-------------|
| O | 50.06036000 | 38.52608100 | 49.86717400 |
| N | 48.36603800 | 38.57368500 | 51.35690100 |
| H | 47.77501900 | 38.03725200 | 51.98145200 |
| C | 47.95719900 | 39.92116100 | 50.99067900 |
| C | 46.42009200 | 39.95028000 | 50.75563200 |
| C | 45.96516300 | 40.30743700 | 49.31820000 |
| C | 44.44473500 | 40.10612400 | 49.19103600 |
| H | 43.88887100 | 40.68239600 | 49.93796500 |
| H | 44.18971600 | 39.04601700 | 49.32935700 |
| H | 44.08962300 | 40.39594500 | 48.19413700 |
| C | 46.67657000 | 39.55500900 | 48.18273500 |
| H | 46.43052400 | 40.00505600 | 47.21346400 |
| H | 46.34640200 | 38.51755400 | 48.13337500 |
| H | 47.76565000 | 39.53997700 | 48.28229800 |
| H | 46.17466100 | 41.37299100 | 49.16951000 |
| H | 46.04050700 | 38.94531200 | 50.98743600 |
| H | 45.95722800 | 40.63390000 | 51.46980400 |
| H | 48.46165900 | 40.10333400 | 50.03884900 |
| C | 48.64401600 | 41.01936700 | 51.87017100 |
| O | 48.86991700 | 42.13556200 | 51.35499700 |
| C | 49.72660500 | 40.52424000 | 52.84675900 |
| C | 51.07976800 | 40.47618200 | 52.15953200 |
| H | 51.83633000 | 40.10364300 | 52.85579200 |
| H | 51.35259600 | 41.47680300 | 51.81524300 |
| H | 51.05443600 | 39.82297000 | 51.28571400 |
| C | 49.66485400 | 40.72093200 | 54.30295400 |
| H | 50.60011600 | 40.83258300 | 54.85194600 |
| H | 48.78291700 | 41.14115300 | 54.76542600 |
| O | 49.44362800 | 39.41370400 | 53.73334100 |
| O | 50.31281300 | 38.13883800 | 56.02497100 |
| H | 49.65900700 | 38.71573700 | 56.45024100 |
| H | 50.29739300 | 38.44243500 | 55.09254300 |

TS3<sup>a</sup>

|   |             |             |             |
|---|-------------|-------------|-------------|
| N | 48.96203800 | 43.76544000 | 53.53250200 |
| H | 49.32203100 | 44.72044700 | 53.40060700 |
| H | 49.47228300 | 43.37724200 | 54.33555300 |
| C | 47.49497600 | 43.76758900 | 53.78699900 |
| H | 47.02382900 | 44.12718100 | 52.87503200 |
| C | 46.97590700 | 42.33370900 | 54.14034600 |
| H | 47.41140300 | 42.12999200 | 55.12755000 |
| C | 45.45915800 | 42.37977300 | 54.28781100 |
| H | 44.97521700 | 42.54688700 | 53.31882600 |
| H | 45.15578700 | 41.40541900 | 54.66609900 |



|   |             |             |             |
|---|-------------|-------------|-------------|
| H | 45.11733500 | 43.14150100 | 54.99283200 |
| O | 47.22396000 | 41.17560900 | 53.30860800 |
| H | 49.01882700 | 43.12999500 | 52.59818300 |
| C | 47.20478600 | 44.71179100 | 54.97812300 |
| O | 47.70212500 | 44.46830600 | 56.08629900 |
| N | 46.37675900 | 45.72347800 | 54.70970600 |
| H | 46.19896400 | 45.94505700 | 53.72364000 |
| F | 45.79594700 | 46.69472500 | 55.72110100 |
| F | 44.48714900 | 44.04353300 | 49.86200900 |
| C | 45.86905400 | 44.03733100 | 49.24498800 |
| H | 46.04995200 | 43.16587000 | 48.60643300 |
| H | 46.03343000 | 44.93976600 | 48.64477400 |
| N | 47.01170500 | 44.03529900 | 50.21941700 |
| H | 47.03128200 | 44.89828200 | 50.78932800 |
| H | 47.19165500 | 43.17621900 | 50.81904000 |
| H | 47.89068400 | 44.05493000 | 49.67244500 |
| F | 49.49541500 | 36.51046400 | 50.95783500 |
| C | 49.27148000 | 37.97249200 | 50.72674100 |
| O | 49.86986300 | 38.57727700 | 49.84214200 |
| N | 48.33348000 | 38.57968000 | 51.50983000 |
| H | 47.78121100 | 37.99176700 | 52.12549000 |
| C | 47.84203600 | 39.93398000 | 51.22421000 |
| C | 46.33548600 | 39.89223800 | 50.83757200 |
| C | 46.00756800 | 40.32773800 | 49.38794900 |
| C | 44.49335600 | 40.23756000 | 49.12675800 |
| H | 43.91331600 | 40.85596700 | 49.82032700 |
| H | 44.14786000 | 39.19991400 | 49.23509300 |
| H | 44.25348700 | 40.55035800 | 48.10237400 |
| C | 46.76050000 | 39.57380500 | 48.27895900 |
| H | 46.70402300 | 40.13625400 | 47.33987400 |
| H | 46.28842500 | 38.61207600 | 48.07260700 |
| H | 47.81341700 | 39.38670100 | 48.50939900 |
| H | 46.30058000 | 41.38091100 | 49.31060700 |
| H | 45.96776700 | 38.86720200 | 50.98735700 |
| H | 45.76079000 | 40.52759600 | 51.51995600 |
| H | 48.42191500 | 40.24190400 | 50.35516500 |
| C | 48.26880200 | 41.06262800 | 52.27605700 |
| O | 48.42377900 | 42.23814800 | 51.61300800 |
| C | 49.61768100 | 40.62714200 | 52.93683300 |
| C | 50.82904000 | 40.62571900 | 52.02826100 |
| H | 51.70646800 | 40.28490900 | 52.58463000 |
| H | 51.00853600 | 41.63042300 | 51.63954000 |
| H | 50.69850300 | 39.95760500 | 51.17706600 |
| C | 49.84339700 | 40.76495800 | 54.39086200 |



|                  |             |             |             |
|------------------|-------------|-------------|-------------|
| H                | 50.86327800 | 40.87919000 | 54.75578000 |
| H                | 49.07735700 | 41.14997300 | 55.05544500 |
| O                | 49.53963000 | 39.47818300 | 53.83213300 |
| O                | 50.24499100 | 38.14349500 | 56.14466000 |
| H                | 49.59488400 | 38.64014500 | 56.66627800 |
| H                | 50.10271400 | 38.46671200 | 55.22982400 |
| TS4 <sup>a</sup> |             |             |             |
| N                | 49.18575500 | 43.18030700 | 53.81183800 |
| H                | 49.82413800 | 43.74184900 | 53.24480600 |
| H                | 49.52081200 | 43.19694200 | 54.78301400 |
| C                | 47.81143700 | 43.68155600 | 53.72659000 |
| H                | 47.70142100 | 44.20563600 | 52.77949300 |
| C                | 46.80879900 | 42.49278600 | 53.78622500 |
| H                | 46.89343300 | 42.06380300 | 54.79009800 |
| C                | 45.37450200 | 42.94865400 | 53.53260400 |
| H                | 45.32096300 | 43.65759000 | 52.69888600 |
| H                | 44.75232100 | 42.09791100 | 53.26581300 |
| H                | 44.94780500 | 43.43062900 | 54.41399500 |
| O                | 47.02275000 | 41.37443900 | 52.85912400 |
| H                | 49.18357200 | 42.09349900 | 50.72934700 |
| C                | 47.44118700 | 44.63423900 | 54.91913300 |
| O                | 47.84440800 | 44.35229700 | 56.05415600 |
| N                | 46.59574900 | 45.63454100 | 54.63458600 |
| H                | 46.48123200 | 45.88494100 | 53.64854100 |
| F                | 45.90608200 | 46.57538200 | 55.62428400 |
| F                | 44.42374100 | 44.05404100 | 49.86102100 |
| C                | 45.79335700 | 44.07345200 | 49.22286400 |
| H                | 46.02216400 | 43.15806000 | 48.66693700 |
| H                | 45.90364400 | 44.93766500 | 48.56028600 |
| N                | 46.91056100 | 44.20742200 | 50.21206700 |
| H                | 46.78154000 | 45.01475300 | 50.85223000 |
| H                | 47.10546000 | 43.34588100 | 50.75275400 |
| H                | 47.80492100 | 44.38420200 | 49.72354000 |
| F                | 49.59109600 | 36.50687800 | 50.94540600 |
| C                | 49.46248300 | 37.97493900 | 50.71395600 |
| O                | 49.95372200 | 38.55099600 | 49.74637900 |
| N                | 48.68838200 | 38.63488200 | 51.61321300 |
| H                | 48.39957700 | 38.18172900 | 52.46724700 |
| C                | 48.00418300 | 39.84654900 | 51.22616700 |
| C                | 46.53290700 | 39.49295500 | 50.88392700 |
| C                | 45.79311100 | 40.33494300 | 49.82791800 |
| C                | 44.40096200 | 39.73010600 | 49.58318500 |
| H                | 43.84922400 | 39.59152700 | 50.51870400 |



|   |             |             |             |
|---|-------------|-------------|-------------|
| H | 44.49112700 | 38.75326800 | 49.09192900 |
| H | 43.79918000 | 40.37016400 | 48.92864100 |
| C | 46.56499000 | 40.42371900 | 48.50080200 |
| H | 45.95361600 | 40.89102100 | 47.71895900 |
| H | 46.85023200 | 39.42627400 | 48.14049800 |
| H | 47.48237700 | 41.01311600 | 48.59877300 |
| H | 45.65170800 | 41.34726100 | 50.22441500 |
| H | 46.57390300 | 38.46342700 | 50.50675900 |
| H | 45.94390900 | 39.45415700 | 51.80498200 |
| H | 48.51224700 | 40.13115800 | 50.30445800 |
| C | 48.21290100 | 41.09616900 | 52.19992700 |
| O | 48.42253900 | 42.22819400 | 51.31806100 |
| C | 49.44378900 | 40.96523800 | 53.12163700 |
| C | 50.76001900 | 40.83261100 | 52.40002900 |
| H | 51.54122500 | 40.48500500 | 53.07713700 |
| H | 51.06692500 | 41.78585000 | 51.96231100 |
| H | 50.69218500 | 40.11002800 | 51.57912100 |
| C | 49.35450700 | 40.49113300 | 54.51620600 |
| H | 50.23781300 | 40.79382800 | 55.10437000 |
| H | 48.45255300 | 40.81393700 | 55.05730600 |
| O | 49.34805800 | 39.17768400 | 54.09298000 |
| O | 50.49717100 | 38.00559100 | 56.13863500 |
| H | 49.88828600 | 38.46782000 | 56.73644600 |
| H | 50.26295600 | 38.40963500 | 55.24889700 |

TS5<sup>a</sup>

|   |             |             |             |
|---|-------------|-------------|-------------|
| N | 49.29977400 | 43.02141200 | 53.43701200 |
| H | 50.00581700 | 43.73391800 | 53.19635900 |
| H | 49.49527900 | 42.67952800 | 54.40237700 |
| C | 47.91302700 | 43.62755000 | 53.48279300 |
| H | 47.75332800 | 44.14364300 | 52.54031500 |
| C | 46.95473200 | 42.43673100 | 53.67631200 |
| H | 47.25167900 | 41.95281200 | 54.61148000 |
| C | 45.49976000 | 42.87405900 | 53.67712000 |
| H | 45.28465100 | 43.55719400 | 52.84825600 |
| H | 44.87296000 | 42.00015400 | 53.53756100 |
| H | 45.22279500 | 43.35958400 | 54.61440800 |
| O | 47.08230100 | 41.41628200 | 52.66285500 |
| H | 48.58745100 | 42.48552500 | 50.13573100 |
| C | 47.64887400 | 44.57702000 | 54.70625000 |
| O | 48.02204100 | 44.23159600 | 55.82627400 |
| N | 46.80345100 | 45.59337900 | 54.45329800 |
| H | 46.75340200 | 45.94748300 | 53.49445200 |
| F | 46.05009200 | 46.44643700 | 55.47954800 |



|   |             |             |             |
|---|-------------|-------------|-------------|
| F | 44.38001400 | 44.06196600 | 49.72988800 |
| C | 45.72212400 | 44.28299400 | 49.07241400 |
| H | 46.11950300 | 43.38443400 | 48.59061700 |
| H | 45.66948600 | 45.09995900 | 48.35010900 |
| N | 46.76693000 | 44.68818600 | 50.06611500 |
| H | 46.44744500 | 45.41538300 | 50.73117600 |
| H | 47.09527700 | 43.84841500 | 50.59103500 |
| H | 47.61040900 | 45.09534000 | 49.63334800 |
| F | 49.63037700 | 36.70235200 | 50.98869500 |
| C | 49.59355200 | 38.15939400 | 50.69074100 |
| O | 50.07291800 | 38.64993300 | 49.67859000 |
| N | 48.92255100 | 38.94602400 | 51.59453700 |
| H | 48.49241100 | 38.48208800 | 52.38518600 |
| C | 48.14466500 | 40.04303100 | 51.02628700 |
| C | 46.72808000 | 39.47752900 | 50.75563300 |
| C | 45.71556700 | 40.26256600 | 49.90916600 |
| C | 44.39223500 | 39.48282000 | 49.85964400 |
| H | 44.06889400 | 39.16402700 | 50.85682200 |
| H | 44.50432600 | 38.58753300 | 49.23803300 |
| H | 43.59155200 | 40.08834100 | 49.42332900 |
| C | 46.22253300 | 40.52054200 | 48.48272700 |
| H | 45.45025800 | 41.00159200 | 47.87059500 |
| H | 46.49462100 | 39.58007300 | 47.98397000 |
| H | 47.10511000 | 41.16793900 | 48.47742200 |
| H | 45.52775200 | 41.22069100 | 50.40139300 |
| H | 46.90507100 | 38.51413300 | 50.25677700 |
| H | 46.27871700 | 39.23512900 | 51.72424300 |
| H | 48.63466300 | 40.24900500 | 50.07506300 |
| C | 48.18144700 | 41.38266500 | 51.83296900 |
| O | 47.89899100 | 42.41753500 | 50.82823300 |
| C | 49.54507500 | 41.73123000 | 52.51938400 |
| C | 50.61751100 | 41.92297700 | 51.43357700 |
| H | 51.61410300 | 41.99989100 | 51.87295500 |
| H | 50.46717800 | 42.79708400 | 50.79270700 |
| H | 50.63627600 | 41.02078600 | 50.81155700 |
| C | 50.06470900 | 40.71183200 | 53.58141400 |
| H | 50.38919300 | 39.82131400 | 53.01777600 |
| H | 51.01951800 | 41.16345800 | 53.93963100 |
| O | 49.14390100 | 40.51282700 | 54.55519600 |
| O | 49.96803900 | 38.92651200 | 56.32603800 |
| H | 49.44837000 | 39.24645400 | 57.07793700 |
| H | 49.68091600 | 39.58493700 | 55.56168600 |

TS6<sup>a</sup>



|   |             |             |             |
|---|-------------|-------------|-------------|
| N | 49.04433800 | 43.67470600 | 53.90364600 |
| H | 49.58504600 | 44.51711300 | 53.69884000 |
| H | 49.33944700 | 43.41249100 | 54.85080600 |
| C | 47.63288200 | 44.04512700 | 53.93095500 |
| H | 47.44860800 | 44.63645200 | 53.03584900 |
| C | 46.74911200 | 42.76904000 | 53.77641800 |
| H | 46.94876800 | 42.12784800 | 54.65742000 |
| C | 45.24657500 | 43.06601200 | 53.75047200 |
| H | 45.01789100 | 43.88574000 | 53.05989400 |
| H | 44.71919500 | 42.18481600 | 53.37990000 |
| H | 44.84657700 | 43.32704600 | 54.73527000 |
| O | 47.16161800 | 42.13904300 | 52.59733800 |
| H | 48.61567200 | 42.45766900 | 51.94151600 |
| C | 47.24223600 | 44.87053800 | 55.16319100 |
| O | 47.66994000 | 44.58790200 | 56.29514800 |
| N | 46.37603800 | 45.84661600 | 54.88043600 |
| H | 46.22275400 | 46.06141700 | 53.89130400 |
| F | 45.73161400 | 46.81026100 | 55.85773100 |
| F | 44.43137600 | 44.05850200 | 49.91330800 |
| C | 45.83418900 | 43.96378400 | 49.36356700 |
| H | 46.00496600 | 43.04585700 | 48.78994500 |
| H | 46.08330200 | 44.81946300 | 48.72665300 |
| N | 46.90697700 | 43.95127700 | 50.41759200 |
| H | 47.03129200 | 44.88883700 | 50.84567800 |
| H | 46.77970900 | 43.23394200 | 51.18268800 |
| H | 47.80628100 | 43.73273400 | 49.95167500 |
| F | 49.68557600 | 36.28417400 | 50.98378700 |
| C | 49.52757600 | 37.73611600 | 50.74248300 |
| O | 50.24611000 | 38.39264300 | 50.00249900 |
| N | 48.44653500 | 38.28770800 | 51.35233600 |
| H | 47.83951300 | 37.71357300 | 51.92751600 |
| C | 47.99618700 | 39.59036200 | 50.93501700 |
| C | 46.44120600 | 39.58276500 | 50.86031300 |
| C | 45.76128500 | 40.29365500 | 49.66865900 |
| C | 44.34650200 | 39.71682400 | 49.49573100 |
| H | 43.79632000 | 39.69365800 | 50.44163300 |
| H | 44.40131400 | 38.69361900 | 49.10352900 |
| H | 43.76488200 | 40.30876400 | 48.78144300 |
| C | 46.53961900 | 40.18905900 | 48.34914100 |
| H | 45.94095500 | 40.57119900 | 47.51458900 |
| H | 46.80548900 | 39.15060400 | 48.10901900 |
| H | 47.46223600 | 40.77627000 | 48.38285500 |
| H | 45.65956400 | 41.35222700 | 49.92185300 |
| H | 46.17965100 | 38.51906900 | 50.79132800 |



|   |             |             |             |
|---|-------------|-------------|-------------|
| H | 46.03129700 | 39.97226600 | 51.79472200 |
| H | 48.39843600 | 39.73659500 | 49.92559300 |
| C | 48.68397700 | 40.68007200 | 51.72924700 |
| O | 48.87761900 | 41.81433000 | 51.13827500 |
| C | 49.67071200 | 40.37180500 | 52.83393800 |
| C | 51.09406000 | 40.42889700 | 52.29055600 |
| H | 51.78476500 | 40.13118700 | 53.08436800 |
| H | 51.31763600 | 41.44873000 | 51.96822200 |
| H | 51.22099100 | 39.76075700 | 51.43747400 |
| C | 49.41135300 | 40.66249700 | 54.24539200 |
| H | 50.26047200 | 40.91504500 | 54.87809100 |
| H | 48.44697000 | 41.03710200 | 54.55279500 |
| O | 49.37857300 | 39.29663900 | 53.74931100 |
| O | 50.50686500 | 38.07652800 | 55.98534000 |
| H | 49.91521200 | 38.67533100 | 56.46789800 |
| H | 50.45155100 | 38.40772000 | 55.06555300 |

# INT1<sup>a</sup>

|   |             |             |             |
|---|-------------|-------------|-------------|
| N | 48.88995400 | 43.83519900 | 53.95866300 |
| H | 49.48692400 | 44.62180900 | 53.66627300 |
| H | 49.25985300 | 43.50305800 | 54.86600100 |
| C | 47.45102400 | 44.22210400 | 54.05612900 |
| H | 47.24882700 | 44.79428400 | 53.15893200 |
| C | 46.65965200 | 42.88337600 | 53.92172200 |
| H | 46.92959700 | 42.27507200 | 54.82221200 |
| C | 45.14988200 | 43.12545600 | 53.96277800 |
| H | 44.86244300 | 43.90082700 | 53.24443700 |
| H | 44.65252100 | 42.20578700 | 53.65427700 |
| H | 44.78476700 | 43.40483900 | 54.95685100 |
| O | 47.10402800 | 42.29163700 | 52.76438500 |
| H | 48.89327500 | 43.08011600 | 53.23891900 |
| C | 47.18724300 | 45.03894700 | 55.30210800 |
| O | 47.71809600 | 44.75016200 | 56.38764400 |
| N | 46.27688100 | 45.98078600 | 55.06932800 |
| H | 46.08002100 | 46.19516900 | 54.08600400 |
| F | 45.65088700 | 46.95185300 | 56.04037600 |
| F | 44.48830600 | 43.97768700 | 50.00715800 |
| C | 45.91946200 | 43.93220500 | 49.50259000 |
| H | 46.10913500 | 43.07148400 | 48.85381900 |
| H | 46.17271000 | 44.83675600 | 48.93752900 |
| N | 46.99606100 | 43.83587200 | 50.55988600 |
| H | 47.23068900 | 44.77805300 | 50.92138200 |
| H | 46.85074300 | 43.17742400 | 51.42238700 |
| H | 47.85970300 | 43.48644700 | 50.10480200 |



|                   |             |             |             |
|-------------------|-------------|-------------|-------------|
| F                 | 49.64787000 | 36.37291700 | 51.02810400 |
| C                 | 49.52837800 | 37.82023900 | 50.73551600 |
| O                 | 50.40447300 | 38.48933700 | 50.20399600 |
| N                 | 48.29812400 | 38.33983400 | 50.97110800 |
| H                 | 47.65070100 | 37.83988600 | 51.56937600 |
| C                 | 48.06409000 | 39.72791900 | 50.66057900 |
| C                 | 46.54331900 | 40.00981400 | 50.74905200 |
| C                 | 45.79729200 | 40.21904600 | 49.39456100 |
| C                 | 44.38088500 | 39.64115100 | 49.50327200 |
| H                 | 43.84530900 | 40.05406900 | 50.36384400 |
| H                 | 44.43175300 | 38.55336000 | 49.62517700 |
| H                 | 43.79470700 | 39.85118800 | 48.60102800 |
| C                 | 46.51399300 | 39.67268100 | 48.15088700 |
| H                 | 45.86493500 | 39.73480700 | 47.26996300 |
| H                 | 46.82541800 | 38.63000900 | 48.26870900 |
| H                 | 47.41113400 | 40.25471800 | 47.92958700 |
| H                 | 45.69026700 | 41.29660600 | 49.24035200 |
| H                 | 46.09709500 | 39.13553700 | 51.24190500 |
| H                 | 46.36465100 | 40.85521800 | 51.41819300 |
| H                 | 48.39727000 | 39.87438200 | 49.63025800 |
| C                 | 49.02304700 | 40.68685700 | 51.39609300 |
| O                 | 49.23364900 | 41.79438300 | 50.93413600 |
| C                 | 49.88208700 | 40.28077600 | 52.59594300 |
| C                 | 51.36076900 | 40.43303000 | 52.34208500 |
| H                 | 51.92571300 | 40.19215800 | 53.24731700 |
| H                 | 51.57192900 | 41.45617100 | 52.02208500 |
| H                 | 51.65185700 | 39.75930600 | 51.54027100 |
| C                 | 49.31753700 | 40.45138300 | 53.94585200 |
| H                 | 49.99786500 | 40.70709300 | 54.76037000 |
| H                 | 48.28207700 | 40.76328300 | 54.03725500 |
| O                 | 49.49556500 | 39.12944100 | 53.39439100 |
| O                 | 50.48251600 | 38.04853800 | 55.80294600 |
| H                 | 49.86617300 | 38.69983500 | 56.17142400 |
| H                 | 50.49471900 | 38.28007600 | 54.85038700 |
| INT2 <sup>a</sup> |             |             |             |
| N                 | 48.98871300 | 43.77869200 | 53.58320300 |
| H                 | 49.34561100 | 44.73902900 | 53.46852100 |
| H                 | 49.47393400 | 43.39019100 | 54.40372100 |
| C                 | 47.50740800 | 43.77558500 | 53.78625100 |
| H                 | 47.06991900 | 44.14478700 | 52.86288600 |
| C                 | 46.96628900 | 42.34478000 | 54.12352500 |
| H                 | 47.39389900 | 42.12774100 | 55.11177800 |
| C                 | 45.44950500 | 42.42023800 | 54.27021100 |



|   |             |             |             |
|---|-------------|-------------|-------------|
| H | 44.97081600 | 42.60146100 | 53.30154000 |
| H | 45.12894400 | 41.44900300 | 54.64047400 |
| H | 45.11945700 | 43.18165700 | 54.98088500 |
| O | 47.18811300 | 41.19648400 | 53.28007000 |
| H | 49.11732338 | 43.18623699 | 52.68345235 |
| C | 47.20764000 | 44.71714000 | 54.97733600 |
| O | 47.70545500 | 44.46987600 | 56.08533500 |
| N | 46.37822800 | 45.72710600 | 54.71129200 |
| H | 46.19904200 | 45.94809000 | 53.72506000 |
| F | 45.79457100 | 46.69591400 | 55.72317900 |
| F | 44.48829700 | 44.03997200 | 49.86297200 |
| C | 45.87097700 | 44.02821500 | 49.24669500 |
| H | 46.04972500 | 43.15495900 | 48.60994400 |
| H | 46.03655200 | 44.92838800 | 48.64305400 |
| N | 47.01300800 | 44.02630900 | 50.22066100 |
| H | 47.03589700 | 44.89301100 | 50.78375700 |
| H | 47.19766600 | 43.16683000 | 50.82650100 |
| H | 47.89140200 | 44.03913000 | 49.67313400 |
| F | 49.49046800 | 36.50874100 | 50.95997300 |
| C | 49.26806800 | 37.97061800 | 50.73038500 |
| O | 49.86761500 | 38.57609500 | 49.84639900 |
| N | 48.33224300 | 38.57605100 | 51.51556900 |
| H | 47.78097600 | 37.98586000 | 52.12975100 |
| C | 47.82992700 | 39.92447400 | 51.22068300 |
| C | 46.32531300 | 39.86444900 | 50.82996300 |
| C | 45.99606600 | 40.31617000 | 49.38572200 |
| C | 44.48333000 | 40.21558400 | 49.12106600 |
| H | 43.89739500 | 40.81318800 | 49.82773200 |
| H | 44.14868100 | 39.17218800 | 49.20700000 |
| H | 44.23998500 | 40.54743600 | 48.10359300 |
| C | 46.75849400 | 39.58182900 | 48.27064000 |
| H | 46.66887900 | 40.13498800 | 47.32834600 |
| H | 46.32134000 | 38.60106500 | 48.07856100 |
| H | 47.82039100 | 39.43446500 | 48.48798000 |
| H | 46.28139900 | 41.37202100 | 49.32160000 |
| H | 45.97498100 | 38.83080000 | 50.96122000 |
| H | 45.73811300 | 40.47953500 | 51.51971000 |
| H | 48.40841800 | 40.23115700 | 50.35088400 |
| C | 48.25087800 | 41.06878600 | 52.26155900 |
| O | 48.41883400 | 42.22852700 | 51.59149500 |
| C | 49.58617500 | 40.62242000 | 52.94805000 |
| C | 50.81156300 | 40.60558900 | 52.05768600 |
| H | 51.67661400 | 40.24664700 | 52.62337400 |
| H | 51.01362700 | 41.61094400 | 51.68114100 |



|   |             |             |             |
|---|-------------|-------------|-------------|
| H | 50.68326600 | 39.95006900 | 51.19645600 |
| C | 49.79963100 | 40.77473600 | 54.40357100 |
| H | 50.81942000 | 40.87883500 | 54.77463200 |
| H | 49.03723700 | 41.17925100 | 55.06006100 |
| O | 49.47917500 | 39.48623600 | 53.85867000 |
| O | 50.31028400 | 38.11882100 | 56.09329400 |
| H | 49.65123500 | 38.66837400 | 56.54604600 |
| H | 50.27863500 | 38.45479700 | 55.17227800 |

# INT3<sup>a</sup>

|   |             |             |             |
|---|-------------|-------------|-------------|
| N | 49.14434300 | 43.63535300 | 53.66866400 |
| H | 49.54061000 | 44.56949800 | 53.52903100 |
| H | 49.52499800 | 43.32693200 | 54.56907200 |
| C | 47.69190000 | 43.77238200 | 53.76953100 |
| H | 47.34743800 | 44.23147700 | 52.84408500 |
| C | 46.92026700 | 42.43092600 | 53.96499000 |
| H | 47.11549600 | 42.10793700 | 54.99347300 |
| C | 45.42910300 | 42.70977200 | 53.80416900 |
| H | 45.21424100 | 43.22171500 | 52.85962800 |
| H | 44.91359300 | 41.76083800 | 53.77493300 |
| H | 45.02232900 | 43.30438700 | 54.62455900 |
| O | 47.15874500 | 41.25180400 | 53.12429200 |
| H | 49.04891900 | 42.76205200 | 52.13267000 |
| C | 47.30259800 | 44.67694100 | 54.96422200 |
| O | 47.71451500 | 44.40622100 | 56.10206900 |
| N | 46.48480500 | 45.68877200 | 54.67074100 |
| H | 46.33863100 | 45.91646800 | 53.68288600 |
| F | 45.85367000 | 46.63356200 | 55.67458300 |
| F | 44.43551500 | 44.03824100 | 49.86948900 |
| C | 45.81485500 | 44.05038400 | 49.25307100 |
| H | 46.02431400 | 43.16862300 | 48.63775400 |
| H | 45.96733700 | 44.94693900 | 48.64321500 |
| N | 46.93697100 | 44.09043000 | 50.25058400 |
| H | 46.89128900 | 44.93625600 | 50.85030400 |
| H | 47.05497000 | 43.24072900 | 50.83135300 |
| H | 47.83834500 | 44.14291100 | 49.74091200 |
| F | 49.56168400 | 36.49040300 | 50.96157200 |
| C | 49.36644700 | 37.95617700 | 50.74610400 |
| O | 49.95654300 | 38.57425200 | 49.86867300 |
| N | 48.44568300 | 38.55448300 | 51.55798000 |
| H | 47.89636400 | 37.95254900 | 52.16175200 |
| C | 47.88375800 | 39.86322200 | 51.22579700 |
| C | 46.37479400 | 39.69011400 | 50.87448100 |
| C | 45.85522800 | 40.33990500 | 49.56970300 |



|   |             |             |             |
|---|-------------|-------------|-------------|
| C | 44.38551500 | 39.94592300 | 49.34254000 |
| H | 43.75249100 | 40.21847100 | 50.19236300 |
| H | 44.29970200 | 38.86258600 | 49.18489700 |
| H | 43.98220800 | 40.43324300 | 48.44656900 |
| C | 46.68180200 | 39.99294400 | 48.32384300 |
| H | 46.27092900 | 40.49325000 | 47.43817700 |
| H | 46.67480200 | 38.91698400 | 48.11781100 |
| H | 47.72634500 | 40.29360800 | 48.42687900 |
| H | 45.88581800 | 41.42887400 | 49.69477700 |
| H | 46.19722700 | 38.61048800 | 50.78438400 |
| H | 45.75753700 | 40.04089100 | 51.70625000 |
| H | 48.43440900 | 40.16728800 | 50.33716000 |
| C | 48.26909900 | 41.00191200 | 52.27424900 |
| O | 48.56049300 | 42.14731900 | 51.50225000 |
| C | 49.55880400 | 40.58511200 | 53.03946200 |
| C | 50.83347900 | 40.57412300 | 52.21928200 |
| H | 51.65190400 | 40.17344100 | 52.82436300 |
| H | 51.08997600 | 41.58920200 | 51.90676000 |
| H | 50.74562000 | 39.96269300 | 51.32072200 |
| C | 49.66272900 | 40.74993400 | 54.49616500 |
| H | 50.65423300 | 40.87226000 | 54.93020700 |
| H | 48.85223300 | 41.16423800 | 55.08378300 |
| O | 49.38700800 | 39.45008900 | 53.93992000 |
| O | 50.45253900 | 38.05767400 | 56.04426200 |
| H | 49.83121400 | 38.60924100 | 56.54582300 |
| H | 50.37515700 | 38.42153300 | 55.13650400 |

#### INT4<sup>a</sup>

|   |             |             |             |
|---|-------------|-------------|-------------|
| N | 49.29549700 | 43.07355500 | 53.39762200 |
| H | 49.94460600 | 43.78614100 | 53.02962400 |
| H | 49.61507000 | 42.89407400 | 54.36778600 |
| C | 47.89416700 | 43.64253400 | 53.48101400 |
| H | 47.70145300 | 44.14827400 | 52.53962900 |
| C | 46.96556700 | 42.43206600 | 53.68284500 |
| H | 47.30013200 | 41.91595100 | 54.59094900 |
| C | 45.50912500 | 42.85881700 | 53.75897400 |
| H | 45.26162700 | 43.56203100 | 52.95665400 |
| H | 44.88505000 | 41.98441900 | 53.61684600 |
| H | 45.26555400 | 43.31860300 | 54.71817300 |
| O | 47.05165600 | 41.46647800 | 52.62377600 |
| H | 48.60235600 | 42.48229800 | 50.11342300 |
| C | 47.64391700 | 44.58672700 | 54.70269700 |
| O | 48.03171800 | 44.23491700 | 55.81775000 |
| N | 46.79816800 | 45.60087600 | 54.45573800 |



|   |             |             |             |
|---|-------------|-------------|-------------|
| H | 46.74086700 | 45.95123200 | 53.49523300 |
| F | 46.04686300 | 46.44964900 | 55.48286200 |
| F | 44.38869900 | 44.06576700 | 49.71957800 |
| C | 45.72391900 | 44.27861800 | 49.04621700 |
| H | 46.11553600 | 43.37397200 | 48.57030400 |
| H | 45.66591000 | 45.08632400 | 48.31373100 |
| N | 46.78041100 | 44.69349500 | 50.02254200 |
| H | 46.47515800 | 45.43537200 | 50.67721100 |
| H | 47.10780700 | 43.85980100 | 50.55834400 |
| H | 47.62469100 | 45.07697200 | 49.57128700 |
| F | 49.62339200 | 36.71231200 | 50.98611500 |
| C | 49.57272700 | 38.16789300 | 50.66412900 |
| O | 49.95119400 | 38.61042000 | 49.58322900 |
| N | 48.99357200 | 39.00525200 | 51.57777600 |
| H | 48.78225100 | 38.74309900 | 52.54227500 |
| C | 48.16232600 | 40.06534200 | 51.02077400 |
| C | 46.74728000 | 39.47921700 | 50.77772900 |
| C | 45.73001300 | 40.25990600 | 49.92783200 |
| C | 44.39202100 | 39.50491400 | 49.90172100 |
| H | 44.06456200 | 39.21822100 | 50.90685600 |
| H | 44.48276300 | 38.59211900 | 49.30244600 |
| H | 43.60236200 | 40.11660500 | 49.45253800 |
| C | 46.22260300 | 40.48941500 | 48.49075300 |
| H | 45.44855200 | 40.96941800 | 47.87933400 |
| H | 46.47996900 | 39.53854800 | 48.00473400 |
| H | 47.11263900 | 41.12628800 | 48.46284100 |
| H | 45.55879800 | 41.22999800 | 50.40375000 |
| H | 46.92454400 | 38.51131800 | 50.28959700 |
| H | 46.31218200 | 39.24729500 | 51.75441800 |
| H | 48.61849100 | 40.28930000 | 50.05623800 |
| C | 48.17663800 | 41.40447300 | 51.82533400 |
| O | 47.93911400 | 42.45818600 | 50.83261400 |
| C | 49.52290800 | 41.72353900 | 52.55062800 |
| C | 50.62682900 | 41.89192400 | 51.49133800 |
| H | 51.61561200 | 41.95464700 | 51.95052600 |
| H | 50.49724900 | 42.76345100 | 50.84177500 |
| H | 50.64251800 | 40.98619800 | 50.87552900 |
| C | 49.99399800 | 40.63725900 | 53.58462400 |
| H | 50.68502600 | 39.99528000 | 53.00123100 |
| H | 50.66885200 | 41.18703400 | 54.28611100 |
| O | 48.97970300 | 39.96847900 | 54.18935000 |
| O | 49.94530400 | 38.94157500 | 56.28687800 |
| H | 49.36892700 | 39.32870500 | 56.96105700 |
| H | 49.58064300 | 39.35635600 | 55.40128900 |



EP<sup>a</sup>

|   |             |             |             |
|---|-------------|-------------|-------------|
| N | 49.28248700 | 43.14768100 | 53.14561100 |
| H | 49.89679600 | 43.86004500 | 52.75487100 |
| H | 49.81965300 | 42.06895400 | 55.07424100 |
| C | 47.92292100 | 43.63360300 | 53.40372100 |
| H | 47.50959300 | 44.17114100 | 52.54323700 |
| C | 47.01771400 | 42.42348000 | 53.71423700 |
| H | 47.38351600 | 41.99694600 | 54.65057800 |
| C | 45.54706700 | 42.78155400 | 53.81244500 |
| H | 45.20713000 | 43.33327400 | 52.92991600 |
| H | 44.98228400 | 41.85673000 | 53.85545400 |
| H | 45.32509700 | 43.36657600 | 54.70583600 |
| O | 47.09779000 | 41.34950000 | 52.73214000 |
| H | 48.47354800 | 42.48384800 | 50.14738500 |
| C | 47.69078000 | 44.55846000 | 54.67059100 |
| O | 48.06253100 | 44.20315000 | 55.79148300 |
| N | 46.83086500 | 45.57590000 | 54.43854300 |
| H | 46.79056600 | 45.94856100 | 53.48718100 |
| F | 46.07079600 | 46.43205300 | 55.46429800 |
| F | 44.33592700 | 44.05242800 | 49.76394000 |
| C | 45.68831500 | 44.30578000 | 49.13299400 |
| H | 46.10478400 | 43.42219000 | 48.63950800 |
| H | 45.63665300 | 45.13590000 | 48.42506300 |
| N | 46.71900200 | 44.70408900 | 50.14470200 |
| H | 46.39543100 | 45.42504400 | 50.81447600 |
| H | 47.04440700 | 43.86139200 | 50.66730300 |
| H | 47.56431400 | 45.12423400 | 49.72572900 |
| F | 49.68183200 | 36.69620500 | 51.03790700 |
| C | 49.63196900 | 38.16263500 | 50.79413800 |
| O | 50.24645000 | 38.71402700 | 49.89762400 |
| N | 48.79287200 | 38.87330400 | 51.63149100 |
| H | 48.19216000 | 38.28836400 | 52.20434600 |
| C | 48.08727300 | 40.01070800 | 51.02000800 |
| C | 46.66275400 | 39.49260800 | 50.68652500 |
| C | 45.72770900 | 40.29031100 | 49.76294500 |
| C | 44.38732100 | 39.54972800 | 49.63313800 |
| H | 43.96826500 | 39.29044900 | 50.61186500 |
| H | 44.51265400 | 38.62495800 | 49.05764600 |
| H | 43.64992800 | 40.16395600 | 49.10533400 |
| C | 46.33620500 | 40.52141000 | 48.37338500 |
| H | 45.62339300 | 41.02403500 | 47.70911400 |
| H | 46.61187000 | 39.57085200 | 47.89547900 |
| H | 47.23326100 | 41.14418600 | 48.43092600 |



|   |             |             |             |
|---|-------------|-------------|-------------|
| H | 45.53492500 | 41.25924200 | 50.22908900 |
| H | 46.82312800 | 38.50782900 | 50.22316200 |
| H | 46.14660000 | 39.30073000 | 51.63424500 |
| H | 48.62606600 | 40.19560800 | 50.09111400 |
| C | 48.13108100 | 41.36035500 | 51.81632700 |
| O | 47.75799400 | 42.34595400 | 50.80075000 |
| C | 49.48373600 | 41.82722400 | 52.46874600 |
| C | 50.56324600 | 41.84981300 | 51.35934900 |
| H | 51.55210100 | 42.05151000 | 51.77384200 |
| H | 50.38104500 | 42.61964400 | 50.60278100 |
| H | 50.63388100 | 40.87135200 | 50.87212000 |
| C | 50.03503600 | 40.84846700 | 53.56431000 |
| H | 49.76473400 | 39.81805500 | 53.34863600 |
| H | 51.13121100 | 40.91015300 | 53.54047700 |
| O | 49.56883400 | 41.13591700 | 54.87456800 |
| O | 50.07191600 | 39.05927900 | 56.50727500 |
| H | 49.55422000 | 39.30182500 | 57.28957100 |
| H | 49.96672100 | 39.83962600 | 55.90273900 |

ER<sup>b</sup>(1)

|   |             |             |             |
|---|-------------|-------------|-------------|
| N | 48.73249800 | 43.24781400 | 54.51774500 |
| H | 49.44329700 | 43.56927100 | 53.85435200 |
| H | 49.12916700 | 43.44592900 | 55.44308900 |
| C | 47.47257100 | 43.99675000 | 54.34005700 |
| H | 47.53183000 | 44.58041800 | 53.41816100 |
| C | 46.31546600 | 42.96796800 | 54.16702900 |
| H | 46.37908300 | 42.26352900 | 55.00978500 |
| C | 44.90706600 | 43.52491500 | 54.09657600 |
| H | 44.85905300 | 44.42523800 | 53.47742200 |
| H | 44.25608400 | 42.77056000 | 53.64873300 |
| H | 44.53695500 | 43.75114900 | 55.09727600 |
| O | 46.52646300 | 42.22342900 | 52.95527600 |
| H | 47.24552600 | 41.58793400 | 53.13992900 |
| C | 47.19066900 | 44.96432600 | 55.51697300 |
| O | 47.65113500 | 44.74099000 | 56.64795500 |
| N | 46.33801700 | 45.94310800 | 55.19362900 |
| H | 46.24007500 | 46.15390500 | 54.19545100 |
| F | 45.68026800 | 46.97746400 | 56.10029000 |
| F | 44.62608100 | 44.11463100 | 50.06723300 |
| C | 46.05242200 | 43.96802200 | 49.58392400 |
| H | 46.20811700 | 43.04920400 | 49.01216000 |
| H | 46.36711300 | 44.81758600 | 48.96688300 |
| N | 47.09244100 | 43.90345100 | 50.67488600 |
| H | 47.29390000 | 44.84662000 | 51.05862600 |



|                     |             |             |             |
|---------------------|-------------|-------------|-------------|
| H                   | 46.86560900 | 43.25044400 | 51.45894000 |
| H                   | 47.97500700 | 43.55733800 | 50.26159600 |
| F                   | 49.79484900 | 35.99029500 | 51.09262400 |
| C                   | 49.63445100 | 37.42422000 | 50.75022200 |
| O                   | 50.23895900 | 37.97048700 | 49.84432300 |
| N                   | 48.66470200 | 38.08671200 | 51.45068900 |
| H                   | 47.97717600 | 37.54557100 | 51.96679200 |
| C                   | 48.21888500 | 39.32513700 | 50.84150100 |
| C                   | 46.68501800 | 39.43030100 | 50.95940900 |
| C                   | 45.91778500 | 40.36160400 | 49.99487700 |
| C                   | 44.43859900 | 39.94431800 | 49.96260100 |
| H                   | 44.03522300 | 39.80977400 | 50.97040000 |
| H                   | 44.31347300 | 38.99925700 | 49.41631700 |
| H                   | 43.82520300 | 40.70366800 | 49.46687300 |
| C                   | 46.49124300 | 40.39175500 | 48.57192300 |
| H                   | 45.85245900 | 40.99049000 | 47.91149200 |
| H                   | 46.55633000 | 39.38661100 | 48.13389400 |
| H                   | 47.48960700 | 40.83900600 | 48.55621900 |
| H                   | 45.96803200 | 41.37197800 | 50.40432000 |
| H                   | 46.32659500 | 38.40749800 | 50.77519600 |
| H                   | 46.40407600 | 39.67825400 | 51.98984100 |
| H                   | 48.46772200 | 39.24259100 | 49.77220900 |
| C                   | 49.06998700 | 40.52305200 | 51.26783500 |
| O                   | 48.62613300 | 41.65322800 | 51.12195700 |
| C                   | 50.53410900 | 40.40809800 | 51.70533100 |
| C                   | 51.44229700 | 41.36886000 | 50.96468800 |
| H                   | 52.43594200 | 41.35220900 | 51.41110900 |
| H                   | 51.03694300 | 42.38049800 | 50.96674700 |
| H                   | 51.56215100 | 41.02243400 | 49.93594800 |
| C                   | 50.85339700 | 39.97718900 | 53.09338000 |
| H                   | 51.73730700 | 40.38581400 | 53.57774600 |
| H                   | 50.05062800 | 39.65303000 | 53.74912500 |
| O                   | 51.12012800 | 39.14542300 | 51.97994400 |
| O                   | 48.21771100 | 40.51000700 | 54.46394500 |
| H                   | 47.67507900 | 40.41020400 | 55.26139400 |
| H                   | 48.57226700 | 41.45794600 | 54.53361200 |
| ER <sup>b</sup> (2) |             |             |             |
| N                   | 49.04223700 | 43.87183800 | 54.25571900 |
| H                   | 49.58819200 | 44.72705300 | 54.13213300 |
| H                   | 49.26993300 | 43.55929300 | 55.20419000 |
| C                   | 47.63204300 | 44.24159300 | 54.18269300 |
| H                   | 47.51045700 | 44.85504800 | 53.28887100 |
| C                   | 46.82226300 | 42.95206000 | 53.93656900 |



|   |             |             |             |
|---|-------------|-------------|-------------|
| H | 47.11190600 | 42.21873500 | 54.70988400 |
| C | 45.31012800 | 43.10158200 | 53.92988300 |
| H | 44.99605300 | 43.93797600 | 53.29753900 |
| H | 44.86440400 | 42.19370700 | 53.51445500 |
| H | 44.91389800 | 43.25778600 | 54.93746400 |
| O | 47.21739700 | 42.43815600 | 52.65100300 |
| H | 49.42841100 | 42.82215100 | 50.75286900 |
| C | 47.15357700 | 45.03623100 | 55.40435400 |
| O | 47.55597000 | 44.76495700 | 56.54822600 |
| N | 46.26789200 | 45.98616600 | 55.08878000 |
| H | 46.16564800 | 46.21209400 | 54.09474300 |
| F | 45.61422500 | 46.97513900 | 56.03675300 |
| F | 44.32220700 | 44.02899000 | 49.96792600 |
| C | 45.72054900 | 44.00407600 | 49.38431200 |
| H | 45.94319300 | 43.06089300 | 48.87272700 |
| H | 45.87669700 | 44.82744500 | 48.67908900 |
| N | 46.80813300 | 44.14629600 | 50.39259800 |
| H | 46.89911300 | 45.09736200 | 50.79528200 |
| H | 46.74002200 | 43.47471800 | 51.18689400 |
| H | 47.74022900 | 43.97793300 | 49.97070100 |
| F | 49.91047900 | 35.99626000 | 51.14960500 |
| C | 49.66440800 | 37.42583900 | 50.87478800 |
| O | 50.45244900 | 38.15837800 | 50.29250400 |
| N | 48.42093700 | 37.85592800 | 51.18719000 |
| H | 47.79000400 | 37.32264400 | 51.77362000 |
| C | 48.03598400 | 39.11447100 | 50.62342900 |
| C | 46.51615500 | 39.29035300 | 50.75395400 |
| C | 45.80800800 | 40.18705300 | 49.71143100 |
| C | 44.35255600 | 39.71228900 | 49.58086800 |
| H | 43.87498900 | 39.58711700 | 50.55851300 |
| H | 44.32259200 | 38.74574600 | 49.05967800 |
| H | 43.75165200 | 40.41934700 | 49.00117200 |
| C | 46.48596900 | 40.21175500 | 48.33205500 |
| H | 45.86727700 | 40.76085600 | 47.61335200 |
| H | 46.63133200 | 39.20090500 | 47.92577900 |
| H | 47.45786800 | 40.70781200 | 48.38586100 |
| H | 45.80517100 | 41.21108300 | 50.09953300 |
| H | 46.11916600 | 38.27225600 | 50.64135300 |
| H | 46.25176100 | 39.61733200 | 51.76625200 |
| H | 48.26831500 | 39.05925300 | 49.55398800 |
| C | 48.95268700 | 40.25815400 | 51.06003400 |
| O | 48.98398400 | 41.22827200 | 50.31244200 |
| C | 49.91212400 | 40.24259000 | 52.24049500 |
| C | 51.30261400 | 40.71999600 | 51.87038900 |



|   |             |             |             |
|---|-------------|-------------|-------------|
| H | 51.98091300 | 40.47736600 | 52.69081300 |
| H | 51.30343700 | 41.79894700 | 51.70631500 |
| H | 51.64881500 | 40.21335300 | 50.97296300 |
| C | 49.41473100 | 40.47773800 | 53.61174200 |
| H | 50.06520500 | 41.01338500 | 54.30268300 |
| H | 48.34843300 | 40.57669200 | 53.79035100 |
| O | 49.84490400 | 39.17401100 | 53.20199400 |
| O | 49.24854500 | 43.64323100 | 51.25585900 |
| H | 48.14259200 | 42.76483000 | 52.49584700 |
| H | 50.13437700 | 43.96844900 | 51.53647100 |

TS1<sup>b</sup>

|   |             |             |             |
|---|-------------|-------------|-------------|
| N | 48.76398900 | 43.32273800 | 54.48841900 |
| H | 49.48955400 | 43.64636000 | 53.82891100 |
| H | 49.13356100 | 43.49524900 | 55.44118800 |
| C | 47.44516900 | 44.03739400 | 54.30146800 |
| H | 47.52693800 | 44.61259200 | 53.38167600 |
| C | 46.34698900 | 42.93365600 | 54.10529400 |
| H | 46.43339800 | 42.27942700 | 55.00243100 |
| C | 44.92211200 | 43.47382400 | 54.08030200 |
| H | 44.83647000 | 44.36197800 | 53.44655100 |
| H | 44.29182900 | 42.69693700 | 53.64256000 |
| H | 44.55378200 | 43.70057600 | 55.08412600 |
| O | 46.65058900 | 42.21779200 | 52.95864400 |
| H | 47.40486200 | 41.21832900 | 53.44606900 |
| C | 47.20126400 | 44.97326700 | 55.49428800 |
| O | 47.70907500 | 44.72577900 | 56.60284200 |
| N | 46.33289100 | 45.93920300 | 55.19704800 |
| H | 46.19821000 | 46.13302000 | 54.19903300 |
| F | 45.67367200 | 46.96821800 | 56.10046300 |
| F | 44.62787200 | 44.11373800 | 50.06429100 |
| C | 46.06629900 | 43.94100100 | 49.62400300 |
| H | 46.21978500 | 43.02126500 | 49.05595300 |
| H | 46.41432500 | 44.78534600 | 49.01730600 |
| N | 47.06697100 | 43.85438400 | 50.74952400 |
| H | 47.27973700 | 44.80109000 | 51.11330300 |
| H | 46.81015700 | 43.19994700 | 51.55819700 |
| H | 47.94802500 | 43.47805600 | 50.36433500 |
| F | 49.79295300 | 36.01141400 | 51.07877000 |
| C | 49.63610300 | 37.44540200 | 50.74046400 |
| O | 50.25661300 | 38.00054200 | 49.84994200 |
| N | 48.65067700 | 38.09153600 | 51.42596900 |
| H | 47.96845400 | 37.54610700 | 51.94326400 |
| C | 48.20841700 | 39.33591900 | 50.83355100 |



|   |             |             |             |
|---|-------------|-------------|-------------|
| C | 46.67505900 | 39.42884300 | 50.96206500 |
| C | 45.89563000 | 40.37455500 | 50.02542500 |
| C | 44.42510100 | 39.92789600 | 49.97163700 |
| H | 44.02491500 | 39.73447900 | 50.97162900 |
| H | 44.32021800 | 39.00746800 | 49.38005500 |
| H | 43.79550400 | 40.69754400 | 49.51342300 |
| C | 46.47389400 | 40.45666700 | 48.60584800 |
| H | 45.82438500 | 41.05759000 | 47.95784800 |
| H | 46.56182400 | 39.46419900 | 48.14269400 |
| H | 47.46256000 | 40.92557900 | 48.60676000 |
| H | 45.92440300 | 41.36889500 | 50.47392300 |
| H | 46.32756500 | 38.40633600 | 50.75240500 |
| H | 46.40480200 | 39.65075300 | 51.99946800 |
| H | 48.44733700 | 39.26319000 | 49.76151200 |
| C | 49.07750100 | 40.51942600 | 51.26472800 |
| O | 48.68583700 | 41.65721300 | 51.06204300 |
| C | 50.52912900 | 40.37901100 | 51.75073400 |
| C | 51.46548300 | 41.31707500 | 51.01642400 |
| H | 52.46149200 | 41.25418100 | 51.45132900 |
| H | 51.09708200 | 42.34260300 | 51.03439800 |
| H | 51.56024900 | 40.98448800 | 49.98047000 |
| C | 50.81762400 | 39.95217600 | 53.14657400 |
| H | 51.69820000 | 40.34705100 | 53.65136600 |
| H | 49.98468200 | 39.65119200 | 53.77416900 |
| O | 51.09711400 | 39.11085000 | 52.04421600 |
| O | 48.07042600 | 40.57793400 | 54.06236600 |
| H | 47.52994700 | 40.28651800 | 54.81277600 |
| H | 48.64777400 | 42.28029900 | 54.36772200 |

TS3<sup>b</sup>

|   |             |             |             |
|---|-------------|-------------|-------------|
| N | 49.15579400 | 43.79118400 | 53.85675100 |
| H | 49.44740400 | 44.72069400 | 54.19087200 |
| H | 49.59098600 | 43.11481500 | 54.49065800 |
| C | 47.65854000 | 43.73042300 | 53.88136900 |
| H | 47.32790500 | 44.12026500 | 52.92290600 |
| C | 47.01821600 | 42.32139200 | 54.15958600 |
| H | 47.31355700 | 42.09267300 | 55.19138100 |
| C | 45.50210800 | 42.49717000 | 54.10964900 |
| H | 45.16977100 | 42.73060800 | 53.09200200 |
| H | 45.07282900 | 41.54357600 | 54.39760700 |
| H | 45.12812100 | 43.26228200 | 54.79365600 |
| O | 47.26189200 | 41.09294900 | 53.41232800 |
| H | 49.09979400 | 42.87053100 | 51.33544500 |
| C | 47.24277200 | 44.67672700 | 55.04278300 |



|   |             |             |             |
|---|-------------|-------------|-------------|
| O | 47.66484500 | 44.44625200 | 56.18670300 |
| N | 46.44596600 | 45.69541400 | 54.71304600 |
| H | 46.33614700 | 45.91993400 | 53.71726500 |
| F | 45.82048200 | 46.67606000 | 55.69124900 |
| F | 44.47856200 | 44.07306700 | 49.85127300 |
| C | 45.87386400 | 44.12845000 | 49.26002200 |
| H | 46.10671800 | 43.26253700 | 48.63005700 |
| H | 46.01865400 | 45.04010000 | 48.67048600 |
| N | 46.97038900 | 44.15576500 | 50.27864000 |
| H | 46.94231600 | 45.00073600 | 50.87595300 |
| H | 47.05126700 | 43.28549700 | 50.85585000 |
| H | 47.89318300 | 44.19061400 | 49.80644400 |
| F | 49.53053300 | 36.41031700 | 50.99049700 |
| C | 49.28321400 | 37.87276500 | 50.82151400 |
| O | 49.89631500 | 38.52212800 | 49.97863600 |
| N | 48.31813100 | 38.42495100 | 51.61010200 |
| H | 47.75223600 | 37.80234300 | 52.17770100 |
| C | 47.81777300 | 39.76910400 | 51.32851400 |
| C | 46.33187300 | 39.74823100 | 50.88032900 |
| C | 46.08891600 | 40.28385300 | 49.44667000 |
| C | 44.58959000 | 40.26880200 | 49.10631100 |
| H | 43.99691600 | 40.85618400 | 49.81599800 |
| H | 44.20325500 | 39.23975200 | 49.11718200 |
| H | 44.41437100 | 40.66607800 | 48.09846400 |
| C | 46.86692700 | 39.55138200 | 48.34043500 |
| H | 46.81250000 | 40.12162600 | 47.40608100 |
| H | 46.41907300 | 38.57870500 | 48.12400500 |
| H | 47.92124200 | 39.38438900 | 48.58111400 |
| H | 46.43524800 | 41.32425900 | 49.44553300 |
| H | 45.96185400 | 38.71459400 | 50.93946400 |
| H | 45.72434400 | 40.33855400 | 51.57525200 |
| H | 48.41696200 | 40.07214000 | 50.47377700 |
| C | 48.20631800 | 40.95071700 | 52.32887400 |
| O | 48.15853300 | 42.06110500 | 51.54086900 |
| C | 49.61148300 | 40.61153200 | 52.94294300 |
| C | 50.81755100 | 40.68251500 | 52.02481600 |
| H | 51.00028400 | 41.70831100 | 51.69206300 |
| H | 50.69456500 | 40.05120300 | 51.14373200 |
| H | 51.70140700 | 40.32377700 | 52.55993000 |
| C | 49.85992300 | 40.69714400 | 54.40451200 |
| H | 50.88167700 | 40.85060700 | 54.75774000 |
| H | 49.08769500 | 41.02319200 | 55.09650500 |
| O | 49.60406800 | 39.43444400 | 53.79357200 |
| O | 49.58813300 | 43.88397900 | 51.39062100 |



|                  |             |             |             |
|------------------|-------------|-------------|-------------|
| H                | 49.49995800 | 43.77103600 | 52.75427400 |
| H                | 50.53807600 | 43.90479000 | 51.13451300 |
| TS6 <sup>b</sup> |             |             |             |
| N                | 49.03755800 | 43.89641000 | 54.08304100 |
| H                | 49.52233000 | 44.79699400 | 54.14434900 |
| H                | 49.29100100 | 43.41443900 | 54.95135800 |
| C                | 47.59785500 | 44.18324100 | 54.07342800 |
| H                | 47.42720600 | 44.81403000 | 53.20312900 |
| C                | 46.84838400 | 42.85958100 | 53.76378300 |
| H                | 47.14615900 | 42.13725600 | 54.55899800 |
| C                | 45.32541200 | 42.99465300 | 53.82487300 |
| H                | 44.97082800 | 43.81914700 | 53.19651800 |
| H                | 44.88361300 | 42.07999800 | 53.42288900 |
| H                | 44.95118800 | 43.14969500 | 54.84327800 |
| O                | 47.28836100 | 42.41786100 | 52.51466400 |
| H                | 49.39219100 | 42.60910700 | 50.92096000 |
| C                | 47.15684800 | 44.95274800 | 55.31303900 |
| O                | 47.58489600 | 44.68568000 | 56.44956000 |
| N                | 46.27787600 | 45.91469800 | 55.01466200 |
| H                | 46.13673700 | 46.12372800 | 54.02333000 |
| F                | 45.64617100 | 46.90150200 | 55.97348400 |
| F                | 44.33754900 | 44.03738400 | 49.96470800 |
| C                | 45.75558500 | 43.94316000 | 49.44763500 |
| H                | 45.96309500 | 42.98359600 | 48.96284900 |
| H                | 45.96814500 | 44.74531300 | 48.72952700 |
| N                | 46.80082800 | 44.06743300 | 50.50157900 |
| H                | 46.80853700 | 45.00769100 | 50.93247500 |
| H                | 46.81810800 | 43.32320700 | 51.33055800 |
| H                | 47.71870100 | 43.98637600 | 50.04084400 |
| F                | 49.78463100 | 36.12535900 | 51.05946800 |
| C                | 49.54325500 | 37.55575100 | 50.78893000 |
| O                | 50.34975100 | 38.29498300 | 50.23443500 |
| N                | 48.29028400 | 37.98645500 | 51.06644100 |
| H                | 47.68268800 | 37.47883300 | 51.69962300 |
| C                | 47.97700800 | 39.31365900 | 50.62149600 |
| C                | 46.50958600 | 39.69636200 | 50.92300100 |
| C                | 45.65716500 | 40.23476900 | 49.72257000 |
| C                | 44.38908300 | 39.39002800 | 49.54559900 |
| H                | 43.86165000 | 39.23389300 | 50.49273400 |
| H                | 44.65942800 | 38.41368900 | 49.13633300 |
| H                | 43.69244900 | 39.85517600 | 48.84007600 |
| C                | 46.38801200 | 40.35331300 | 48.37462100 |
| H                | 45.71702900 | 40.78709200 | 47.62477400 |



|   |             |             |             |
|---|-------------|-------------|-------------|
| H | 46.70427400 | 39.37438400 | 47.98755700 |
| H | 47.27145000 | 40.99538900 | 48.44515500 |
| H | 45.33533700 | 41.24125700 | 50.00434700 |
| H | 46.03149500 | 38.78837800 | 51.30957000 |
| H | 46.49900800 | 40.45009800 | 51.71687900 |
| H | 48.14070200 | 39.32698200 | 49.54074500 |
| C | 49.00424100 | 40.33707500 | 51.08626000 |
| O | 49.11932300 | 41.32351300 | 50.35153000 |
| C | 49.91976300 | 40.24010600 | 52.28588800 |
| C | 51.34848100 | 40.63455700 | 51.97140200 |
| H | 51.98005700 | 40.37314500 | 52.82258300 |
| H | 51.42936000 | 41.70778600 | 51.78206300 |
| H | 51.69402100 | 40.09537100 | 51.09448500 |
| C | 49.37585200 | 40.45348300 | 53.64111400 |
| H | 50.03151200 | 40.91357800 | 54.38084800 |
| H | 48.31242500 | 40.62198200 | 53.76265200 |
| O | 49.75231200 | 39.14214200 | 53.19794900 |
| O | 49.34346000 | 43.50139000 | 51.45327800 |
| H | 48.85906300 | 43.25315300 | 52.36183300 |
| H | 50.26744400 | 43.83748500 | 51.62802600 |

# INT2<sup>b</sup>

|   |             |             |             |
|---|-------------|-------------|-------------|
| N | 49.12273300 | 43.77956700 | 53.80165000 |
| H | 49.43650800 | 44.71286000 | 54.11211000 |
| H | 49.57488300 | 43.09563500 | 54.41824500 |
| C | 47.61841500 | 43.71359400 | 53.87045800 |
| H | 47.26505800 | 44.08409900 | 52.91454700 |
| C | 47.00772000 | 42.29974600 | 54.19260300 |
| H | 47.33566200 | 42.10206000 | 55.22198500 |
| C | 45.48982400 | 42.46475900 | 54.18262300 |
| H | 45.12990100 | 42.68970800 | 53.17239700 |
| H | 45.08569500 | 41.50393200 | 54.48161000 |
| H | 45.12276700 | 43.22626900 | 54.87480300 |
| O | 47.24443800 | 41.07142500 | 53.46087400 |
| H | 49.28000900 | 43.01534400 | 51.12259300 |
| C | 47.24199700 | 44.67563700 | 55.03263900 |
| O | 47.68988500 | 44.44935600 | 56.16756600 |
| N | 46.44036700 | 45.69334800 | 54.71109200 |
| H | 46.31905200 | 45.91357900 | 53.71551200 |
| F | 45.81929200 | 46.67693000 | 55.68946700 |
| F | 44.47930200 | 44.06667800 | 49.85389600 |
| C | 45.87749800 | 44.11205000 | 49.26743700 |
| H | 46.10569900 | 43.24627700 | 48.63607500 |
| H | 46.02850100 | 45.02322500 | 48.67809300 |



|                   |             |             |             |
|-------------------|-------------|-------------|-------------|
| N                 | 46.97388700 | 44.13558400 | 50.28658300 |
| H                 | 46.93296300 | 44.97566400 | 50.88910100 |
| H                 | 47.07899000 | 43.25922600 | 50.86009600 |
| H                 | 47.89652700 | 44.19738800 | 49.81409400 |
| F                 | 49.52210000 | 36.41609200 | 50.99611100 |
| C                 | 49.27693900 | 37.88075700 | 50.82100400 |
| O                 | 49.89972200 | 38.52690500 | 49.98207400 |
| N                 | 48.30515200 | 38.43785800 | 51.59642100 |
| H                 | 47.73878900 | 37.81965400 | 52.16824100 |
| C                 | 47.81581400 | 39.79296400 | 51.33041100 |
| C                 | 46.33226700 | 39.78476900 | 50.87517100 |
| C                 | 46.10013700 | 40.29863300 | 49.43191400 |
| C                 | 44.60195000 | 40.29397400 | 49.08548900 |
| H                 | 44.01132500 | 40.89182200 | 49.78805200 |
| H                 | 44.20677400 | 39.26839200 | 49.10366400 |
| H                 | 44.43363100 | 40.68411000 | 48.07365200 |
| C                 | 46.87387400 | 39.54336300 | 48.33850000 |
| H                 | 46.82543900 | 40.09998600 | 47.39552600 |
| H                 | 46.41649300 | 38.57245100 | 48.13561100 |
| H                 | 47.92602400 | 39.37036100 | 48.58432400 |
| H                 | 46.45679900 | 41.33564500 | 49.41564700 |
| H                 | 45.94508100 | 38.75844600 | 50.95226900 |
| H                 | 45.73213900 | 40.39767300 | 51.55685200 |
| H                 | 48.42248300 | 40.10646700 | 50.48378900 |
| C                 | 48.20733700 | 40.95663000 | 52.35376000 |
| O                 | 48.19248700 | 42.09377000 | 51.64266300 |
| C                 | 49.60143200 | 40.58464200 | 52.97981300 |
| C                 | 50.80867500 | 40.67013000 | 52.06344500 |
| H                 | 50.97862700 | 41.69916100 | 51.73113400 |
| H                 | 50.69057500 | 40.04223900 | 51.17878300 |
| H                 | 51.69885200 | 40.31971900 | 52.59378500 |
| C                 | 49.85010400 | 40.66026000 | 54.44300000 |
| H                 | 50.87179300 | 40.80872400 | 54.79920100 |
| H                 | 49.07615600 | 40.97942500 | 55.13679000 |
| O                 | 49.59606600 | 39.40151700 | 53.82031500 |
| O                 | 49.60932700 | 43.97210400 | 51.16779700 |
| H                 | 49.42186100 | 43.69535300 | 52.78503600 |
| H                 | 50.58096100 | 43.99780800 | 51.00001800 |
| INT3 <sup>b</sup> |             |             |             |
| N                 | 49.16651300 | 43.73181000 | 53.86816100 |
| H                 | 49.45051100 | 44.70351000 | 54.04461600 |
| H                 | 49.55546300 | 43.22090700 | 54.66532500 |
| C                 | 47.69254800 | 43.71008400 | 53.91040300 |



|   |             |             |             |
|---|-------------|-------------|-------------|
| H | 47.32848700 | 44.10148900 | 52.96047200 |
| C | 47.02001700 | 42.31947200 | 54.19234500 |
| H | 47.32559100 | 42.06000900 | 55.21169400 |
| C | 45.50652900 | 42.49409800 | 54.15641500 |
| H | 45.16531100 | 42.76570400 | 53.15097300 |
| H | 45.07221700 | 41.53456500 | 54.41600400 |
| H | 45.14527700 | 43.23993400 | 54.86726200 |
| O | 47.22604800 | 41.07019300 | 53.41816400 |
| H | 48.93311300 | 42.46531300 | 51.29903600 |
| C | 47.25041600 | 44.65913500 | 55.06548300 |
| O | 47.64121300 | 44.43671700 | 56.22219300 |
| N | 46.45928600 | 45.68114300 | 54.72087000 |
| H | 46.36539900 | 45.90656000 | 53.72494700 |
| F | 45.82624100 | 46.66945500 | 55.69065100 |
| F | 44.47781500 | 44.07885100 | 49.84883100 |
| C | 45.87138300 | 44.15269700 | 49.25715900 |
| H | 46.12134300 | 43.28666000 | 48.63414500 |
| H | 46.00598800 | 45.06362100 | 48.66483700 |
| N | 46.95968400 | 44.20368900 | 50.28398400 |
| H | 46.92672700 | 45.05791300 | 50.87066600 |
| H | 46.99546200 | 43.36132800 | 50.88468400 |
| H | 47.89503700 | 44.21568400 | 49.83425200 |
| F | 49.54100200 | 36.41208300 | 50.98147500 |
| C | 49.28756200 | 37.87165200 | 50.82638700 |
| O | 49.89397600 | 38.53730500 | 49.99242500 |
| N | 48.31729400 | 38.40418500 | 51.62522100 |
| H | 47.75269100 | 37.76936100 | 52.18066000 |
| C | 47.80995100 | 39.74095400 | 51.35614500 |
| C | 46.33057200 | 39.72900700 | 50.88160700 |
| C | 46.11516300 | 40.29192800 | 49.45340000 |
| C | 44.62208200 | 40.29611600 | 49.08790200 |
| H | 44.02182900 | 40.87246700 | 49.80014900 |
| H | 44.22736500 | 39.27068000 | 49.06710300 |
| H | 44.46941500 | 40.71852800 | 48.08684200 |
| C | 46.90471200 | 39.56999700 | 48.34885100 |
| H | 46.84271800 | 40.14108100 | 47.41580500 |
| H | 46.47183900 | 38.59029900 | 48.13176800 |
| H | 47.96110600 | 39.41749900 | 48.59024900 |
| H | 46.46805000 | 41.33028000 | 49.47288500 |
| H | 45.96287300 | 38.69396300 | 50.91397800 |
| H | 45.70989400 | 40.30437100 | 51.57706000 |
| H | 48.42007300 | 40.05524600 | 50.51252400 |
| C | 48.17585900 | 40.89481600 | 52.38806200 |
| O | 48.07841000 | 42.03037400 | 51.56181300 |



|   |             |             |             |
|---|-------------|-------------|-------------|
| C | 49.59315300 | 40.60486900 | 52.97528100 |
| C | 50.78941300 | 40.70572200 | 52.04751700 |
| H | 50.95918900 | 41.74003400 | 51.73411400 |
| H | 50.67649100 | 40.08168100 | 51.15977800 |
| H | 51.67888100 | 40.35389000 | 52.57695900 |
| C | 49.83742100 | 40.68519700 | 54.42897700 |
| H | 50.85592400 | 40.86002600 | 54.77761200 |
| H | 49.06079700 | 41.00273400 | 55.11695500 |
| O | 49.60146700 | 39.41663100 | 53.81213600 |
| O | 49.62755300 | 43.89515800 | 51.21909800 |
| H | 49.57897100 | 43.83827000 | 52.22364800 |
| H | 50.59245800 | 44.02442000 | 51.04502600 |
